# Supplementary material for: A Human Retinal Pigment Epithelium-Based Screening Platform Reveals Inducers of Photoreceptor Outer Segments Phagocytosis
Source: PubMed Central journal article supplement (PMC7724476; doi:10.1016/j.stemcr.2020.10.013), 2020-11-25
Supplement: mmc1.pdf [file mmc1.pdf]

**Stem Cell Reports, Volume 15**

**Supplemental Information**

**A Human Retinal Pigment Epithelium-Based Screening Platform Reveals Inducers of Photoreceptor Outer Segments Phagocytosis**

**Sven Schreiter, Katerina Vafia, Rico Barsacchi, Stephen H. Tsang, Marc Bickle, Marius Ader, Mike O. Karl, Elly M. Tanaka, and Seba Almedawar**

Supplemental Information: Figures and Legends

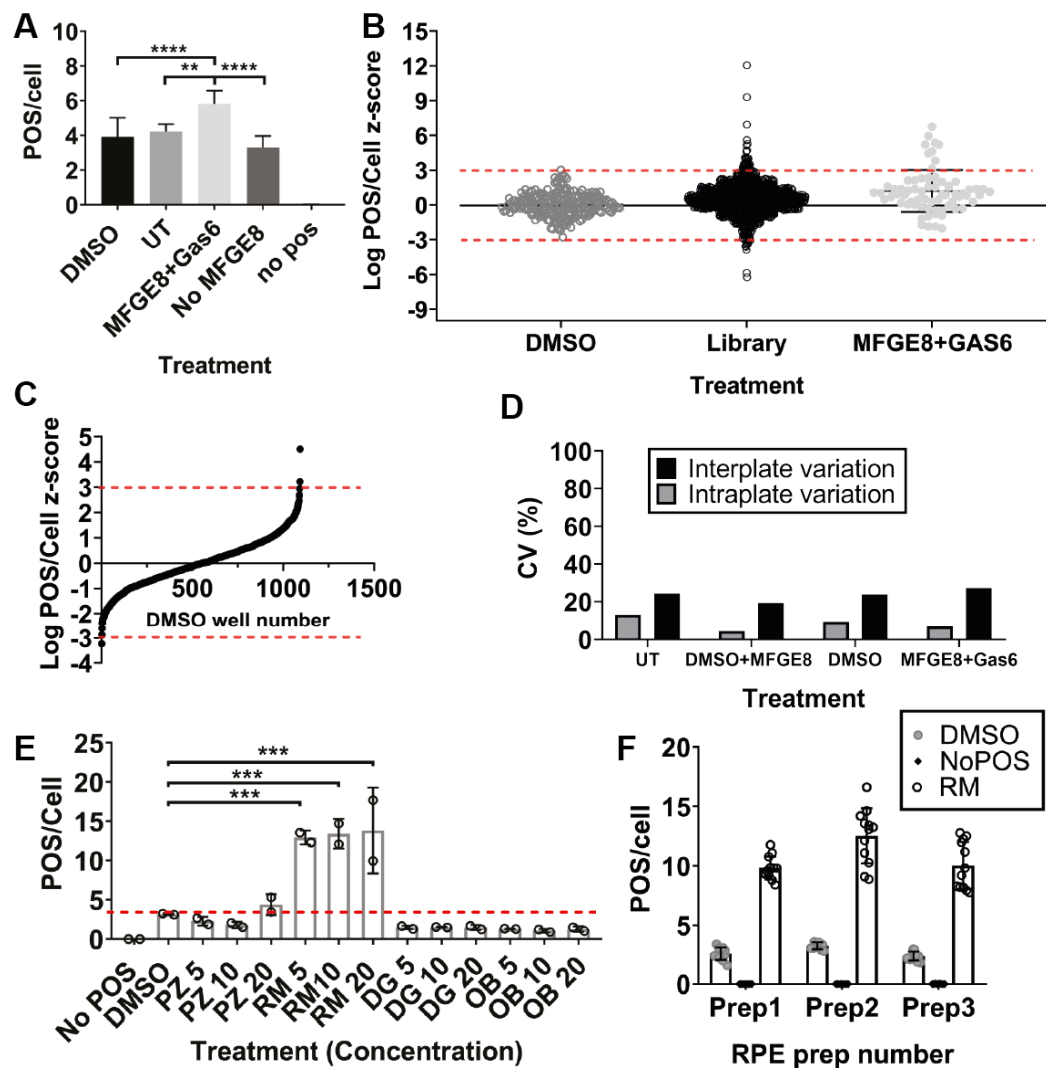

**Figure S1. The screening platform demonstrates low false positive/negative rate and reproducibility across different human RPE preps. Related to Figure 3.**

(A) Controls from one screening plate. MFGE8/GAS6: 2.5  $\mu\text{g/ml}$  were added from each ligand. UT: Untreated. Data are represented as the mean  $\pm$  SD.  $n=24$  wells DMSO and  $n=4$  wells of each treatment. Significance was calculated using one-way-ANOVA. All treatments were compared to DMSO. ns  $>0.05$ , \* $<0.05$ , \*\* $<0.01$ , \*\*\* $<0.001$ , \*\*\*\* $<0.0001$ .

(B) The z-score of the log of the POS/cell within each DMSO, Library, or MFGE8+GAS6 well that was used in the screen was plotted. Dotted lines show the z-score threshold (-3, +3) that was used in the screen to determine hits. The graph shows that the library is spread over the z-score axis, while DMSO wells are concentrated between -3 and +3, and most of the MFGE8+GAS6 wells show a positive z-score.

(C) The z-score of the log of the POS/cell within each DMSO well that was used in the screen was plotted. The graph shows two wells that were identified as false positive and 1 that was identified as false negative.

(D) Interplate (all screening plates from 4 runs) and Intraplate (plate 1 from run 1) variation of the control wells used in the screen.

(E) Confirmation in transwells (Step III). Related to **Table S5**. Data are represented as the mean  $\pm$  SD.  $N=2$  biological repeats. Significance was calculated using one-way-ANOVA. All treatments were compared to DMSO. ns  $>0.05$ , \* $<0.05$ , \*\* $<0.01$ , \*\*\* $<0.001$ , \*\*\*\* $<0.0001$ .

(F) Increase of POS phagocytosis using RM (RM) compared to DMSO was confirmed over 3 RPE differentiation rounds performed on different days. Data represent the mean of the total POS/cell count  $\pm$  SD.  $n=12$  wells per RPE differentiation batch.

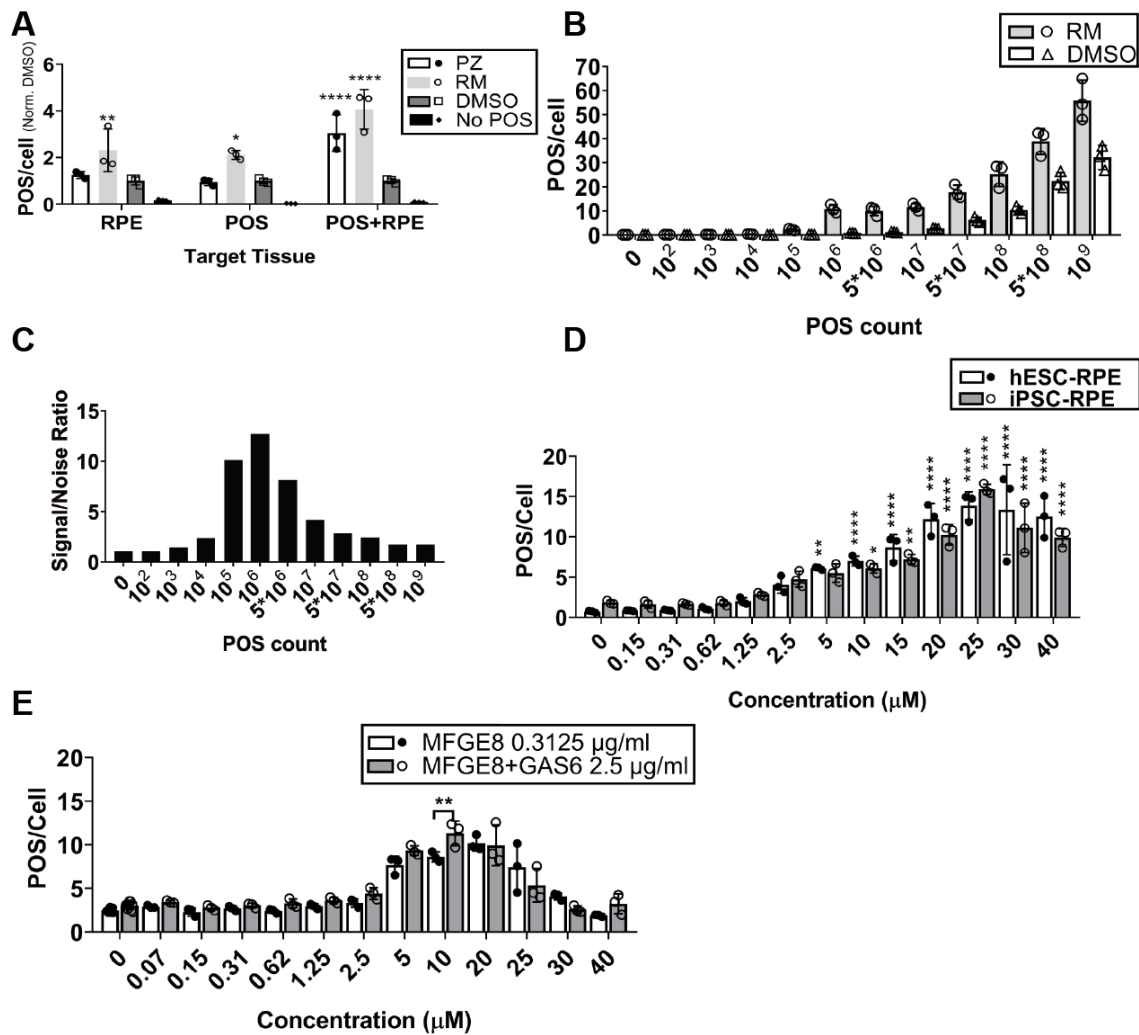

**Figure S2. Orthogonal assays show that Ramoplanin acts on both photoreceptor and human RPE cells in a dose dependent manner. Related to Figure 3.**

(A) Ramoplanin (RM)/Pirithione zinc (PZ)/ DMSO were added to hESC-RPE for 1 hour then they were washed off before addition of POS (Target Tissue: RPE), or added to AF555-labeled POS for 1 hour and washed off before addition of POS to RPE (Target Tissue: POS). Alternatively, AF555-labeled POS were added to the cells which were previously treated with the compounds without a washing step in between (Target Tissue: POS+RPE). RM seems to act on both POS and RPE. Data are normalized to DMSO in each target tissue separately and are represented as the mean  $\pm$  SD. N=3 RPE differentiation batches. Significance was calculated using two-way-ANOVA. Samples of the same target tissue were compared to DMSO. ns >0.05, \* <0.05, \*\* <0.01, \*\*\* <0.001, \*\*\*\* <0.0001.

(B) RM was added to RPE cells in the presence of different concentrations of AF555-labeled POS for 3 hours. Fixed cells were analyzed with confocal fluorescence microscopy. Addition of higher concentrations led to increase in the POS/cell count in both RM and DMSO. Data are represented as the mean  $\pm$  SD. N=3 RPE differentiation batches.

(C) Ratio of the POS/cell count in RM treated samples to DMSO samples. The best signal to noise ratio was obtained when cells were challenged with 10<sup>6</sup> POS/well.

(D) Increasing concentrations of RM were added to RPE cells differentiated from hESC and iPSC in the presence of AF555-labeled POS for 3 hours. Fixed cells were analyzed with confocal fluorescence microscopy. Higher concentrations of RM increase the POS/cell count up to 25  $\mu$ M. Addition of higher concentrations causes a drop in the POS/cell count. Data are represented as the mean  $\pm$  SD. N=3 RPE differentiation batches. Significance was calculated using two-way-ANOVA. All treatments were compared to DMSO. ns >0.05, \* <0.05, \*\* <0.01, \*\*\* <0.001, \*\*\*\* <0.0001.

(E) Increasing concentrations of RM were added to hESC-RPE in the presence of AF555-labeled POS and low MFGE8 concentration (0.3125  $\mu$ g/ml) or MFGE8 and GAS6 (each at 2.5  $\mu$ g/ml) for 3 hours. An additive effect is seen and is significant at 10  $\mu$ M concentration of RM. Data are represented as the mean  $\pm$  SD. N=3 RPE differentiation batches. Significance was calculated using two-way-ANOVA. Samples of the same RM concentration, but different ligands concentration were compared. ns >0.05, \* <0.05, \*\* <0.01, \*\*\* <0.001, \*\*\*\* <0.0001.

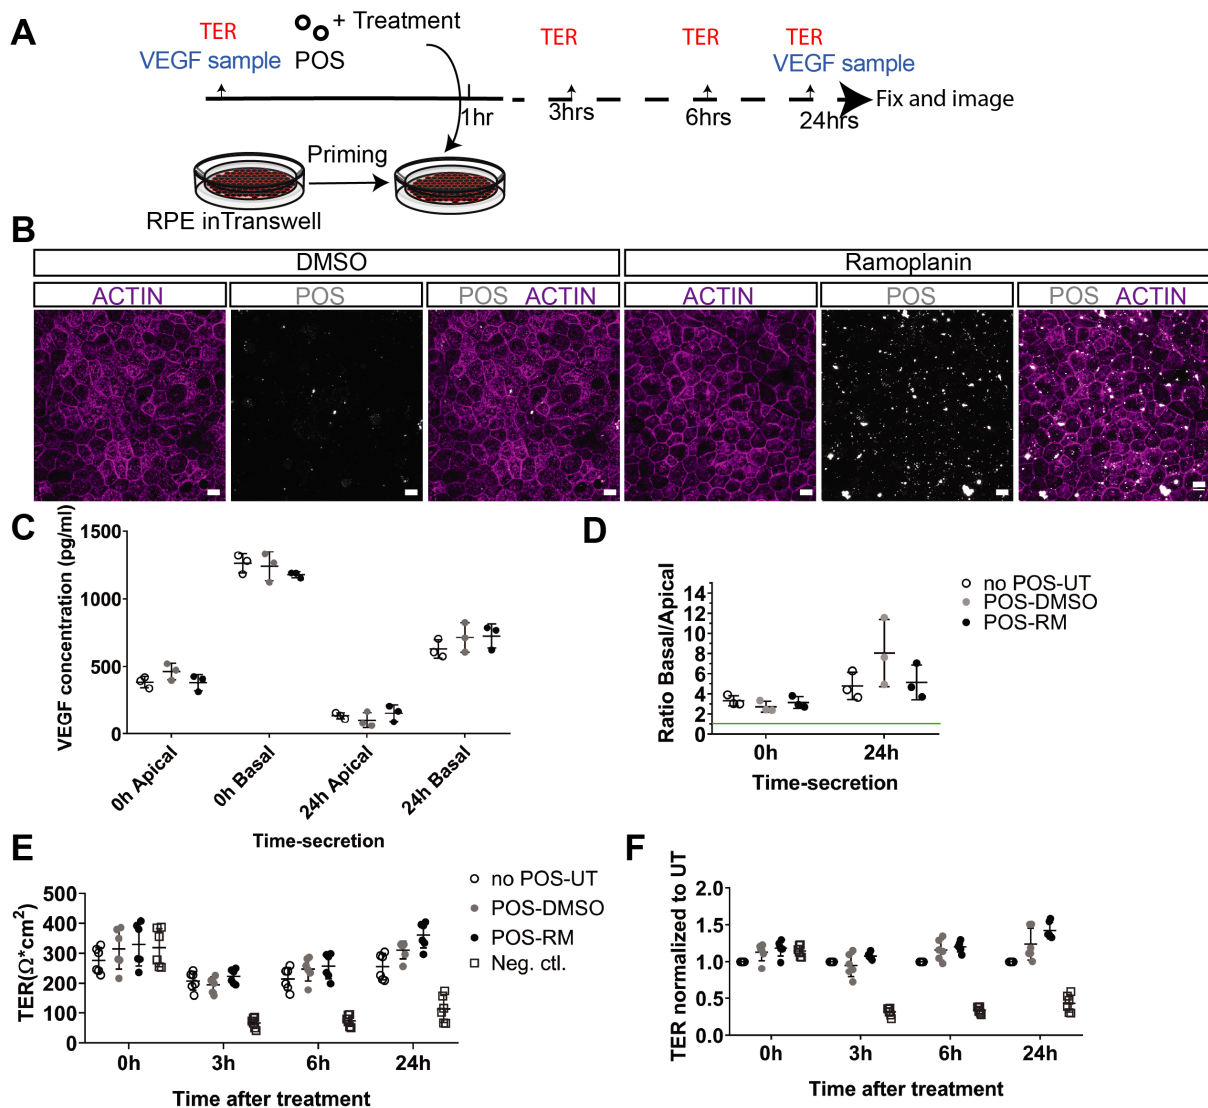

**Figure S3. Ramoplanin does not affect human RPE polarized secretion of VEGF and RPE monolayer integrity. Related to Figure 4.**

(A) Experiment pipeline.

(B) Fluorescence images of hESC-RPE cells cultured in transwells challenged with AF555-labeled POS (Gray) and Ramoplanin (RM)/DMSO for 3 hours. Fixed cells were labeled with Phalloidin (Magenta) to mark the borders of the cells. Scale bar: 10  $\mu$ m.

(C) VEGF values before and 24 hours after treatment with RM/DMSO and POS. Data are represented as the mean  $\pm$  SD. N=3 RPE differentiation batches. RM does not compromise the polarized secretion of VEGF after 24 hours of treatment. UT: untreated.

(D) Ratio of the concentration of VEGF in the basal side of the RPE cells to the apical side. Data are represented as the mean  $\pm$  SD. N=3 RPE differentiation batches.

(E) Transepithelial resistance (TER) values of RPE cells before and 3, 6, 24 hours after treatment with RM/DMSO and POS. A scratch was applied in the middle of the transwell to disturb the monolayer integrity (Neg. ctl.). Data are represented as the mean  $\pm$  SD. N=3 RPE differentiation batches. RM does not compromise the TER of the cells after 24 hours of treatment.

(F) TER values were normalized to DMSO at each time point and plotted. Data are represented as the mean  $\pm$  SD. N=3 RPE differentiation batches.

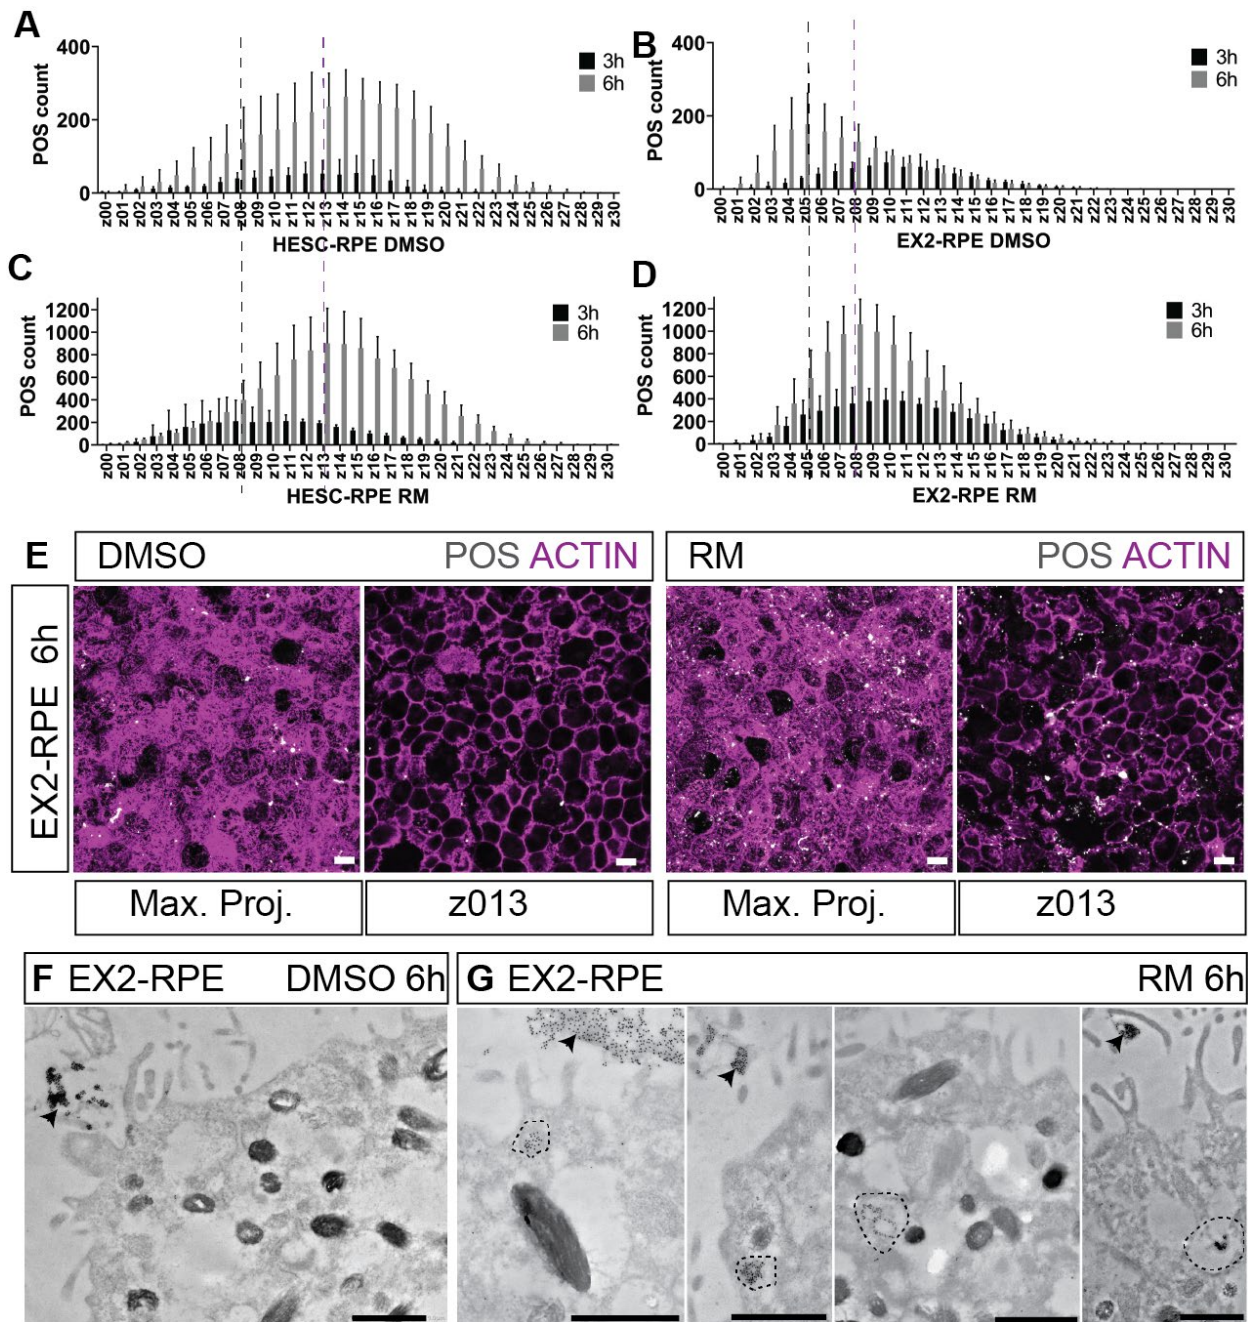

**Figure S4. Ramoplanin rescues internalization defect in human MERTK mutant RPE determined by means of fluorescence confocal microscopy and transmission electron microscopy (TEM). Related to Figure 7.**

(A-D) AF555- labeled POS were added to wild-type RPE (hESC-RPE) and MERTK mutant RPE (EX2-RPE) and left for 3 hours and 6 hours after POS addition. Cells were washed, fixed and labeled with phalloidin to mark the apical and the basal side of the cells. Confocal fluorescence microscopy images were acquired with 31 optical sections (z-stacks) and analyzed to obtain POS count. z0 is at the apical side of the RPE z30 is at the basal side of the RPE. Data represent the mean of the total POS count  $\pm$  SD. N=3 RPE differentiation batches. In hESC-RPE POS are internalized after 6 hours and are mostly found in z13 (A). The amount of POS in z13 increases after treatment with Ramoplanin (RM) (C). At 6 hours POS still accumulate at the surface of the Ex2-RPE (z05, black dotted line, B), while in the presence of RM POS move towards the inside of the cell (z08, purple dotted line, D).

(E) Fluorescence microscopy images of EX2-RPE at 6 hours after addition of AF555-labeled POS and RM/DMSO as in (B-D). Actin is labeled with phalloidin (Magenta). Maximum intensity projection of the 31 optical sections and z13 only are shown. The number of internalized POS is higher in z13 in RM treated samples compared to DMSO.

(F-G) Transmission electron microscopy of EX2-RPE cells treated with POS and DMSO/RM for 6 hours. In DMSO samples, POS are mostly found on the surface of the RPE, while in RM samples internalized POS at the apical side of the RPE could be detected. Scale bar: 1  $\mu$ m.

**Table S1. List of compounds in the FDA approved library (Excel Table). Related to Figure 3.**

**Table S2. List of hits from the primary screening assay. Related to Figure 3.**

| Compound name             | Mean POS/cell DMSO | SD of the Mean POS/cell DMSO | POS/cell Hit | Z-score      | Structure                                                                             |
|---------------------------|--------------------|------------------------------|--------------|--------------|---------------------------------------------------------------------------------------|
| CARBIDOPA                 | 7.72627946         | 1.80183412                   | 18.18239142  | 3.859843239  | 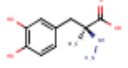   |
|                           | 3.97027337         | 0.72160097                   | 6.987130292  | 3.293712615  |                                                                                       |
| RAMOPLANIN                | 4.00344939         | 0.77791355                   | 10.65762809  | 4.845892949  |    |
|                           | 4.31512749         | 0.62271494                   | 8.368666042  | 9.050912693  |                                                                                       |
|                           | 6.1640321          | 1.53512574                   | 19.56056543  | 4.942319314  |                                                                                       |
|                           | 3.536627           | 0.44530994                   | 10.72073678  | 5.00557346   |                                                                                       |
| CEPHAPIRIN SODIUM         | 4.02359632         | 0.61315362                   | 6.35266788   | 3.007959189  |    |
|                           | 6.24270555         | 1.32986439                   | 13.73751677  | 3.388429658  |                                                                                       |
| DOXORUBICIN               | 5.59807957         | 1.23901679                   | 27.5891581   | 3.388646968  |    |
|                           | 4.73843874         | 1.26001387                   | 11.65284639  | 7.655831648  |                                                                                       |
| HOMIDIUM BROMIDE          | 3.3279917          | 0.66323947                   | 39.13526909  | 13.12391821  |   |
|                           | 3.38773503         | 0.74357468                   | 53.79315086  | 11.13684767  |                                                                                       |
|                           | 4.42129613         | 0.74605771                   | 96.48429397  | 18.78772985  |                                                                                       |
|                           | 6.69223467         | 1.3533011                    | 110.1212104  | 14.40519773  |                                                                                       |
| MERBROMIN                 | 3.3279917          | 0.66323947                   | 9.605061573  | 5.697155474  |  |
|                           | 3.38773503         | 0.74357468                   | 16.28800234  | 6.371631183  |                                                                                       |
|                           | 10.8106779         | 1.49126386                   | 16.77847338  | 3.185274372  |                                                                                       |
|                           | 6.69223467         | 1.3533011                    | 15.69051785  | 4.449296127  |                                                                                       |
| PYRITHIONE ZINC           | 4.42129613         | 0.74605771                   | 8.062179186  | 3.725484414  |  |
|                           | 10.8106779         | 1.49126386                   | 20.57312327  | 4.631893696  |                                                                                       |
|                           | 6.69223467         | 1.3533011                    | 18.92793233  | 5.407738765  |                                                                                       |
| SUCCINYL SULFATHIAZOLE    | 1.76719904         | 0.19447114                   | 2.795        | 4.406777297  |  |
|                           | 7.18489185         | 1.19956523                   | 12.08333333  | 3.286567331  |                                                                                       |
| DIGOXIN                   | 4.02359632         | 0.61315362                   | 1.969020291  | -4.518464121 |  |
|                           | 6.24270555         | 1.32986439                   | 2.655620834  | -3.452450781 |                                                                                       |
| OUABAIN                   | 6.29444936         | 1.21391753                   | 3.408987603  | -3.68263515  |  |
|                           | 5.93189068         | 1.51873745                   | 2.351151505  | -3.152237244 |                                                                                       |
| POTASSIUM p-AMINOBENZOATE | 4.31512749         | 0.62271494                   | 1.842309897  | -5.477229687 |  |
|                           | 4.00344939         | 0.77791355                   | 1.270037248  | -6.755468742 |                                                                                       |
|                           | 3.536627           | 0.44530994                   | 1.525836523  | -6.196451042 |                                                                                       |
| SENNOSIDE A               | 3.50911            | 0.69084309                   | 1.142751273  | -5.504344515 |  |
|                           | 6.42701984         | 1.32842536                   | 2.999972133  | -3.434578951 |                                                                                       |

**Table S3. Autofluorescence values of hits in the absence of POS (Excel Table). Related to Figure 3.**

**Table S4. List of hits from confirmation I in 384-wells plates. Related to Figure 3.**

| Treatments                 | POS per Cell Mean | POS per Cell (Standard deviation) | z-score  |
|----------------------------|-------------------|-----------------------------------|----------|
| <b>DMSO 0.2%</b>           | 8.150224049       | 1.931809451                       |          |
| <b>No POS</b>              | 0.010885128       | 0.003674366                       |          |
| <b>Digoxin 5</b>           | 4.419513352       | 0.934296173                       | -2.59094 |
| <b>Digoxin 10</b>          | 4.536797936       | 1.368324695                       | -2.76922 |
| <b>Digoxin 20</b>          | 5.18449646        | 0.988038768                       | -1.76115 |
| <b>Ouabain 5</b>           | 4.594461362       | 1.3591871                         | -2.44608 |
| <b>Ouabain 10</b>          | 4.509466427       | 1.841329131                       | -2.68072 |
| <b>Ouabain 20</b>          | 5.62181552        | 0.988865715                       | -1.37035 |
| <b>Proscillaridin 5</b>    | 4.700784182       | 1.53164408                        | -2.77648 |
| <b>Proscillaridin 10</b>   | 4.725888169       | 1.694488286                       | -2.61604 |
| <b>Proscillaridin 20</b>   | 5.453510783       | 0.950739994                       | -1.58906 |
| <b>Pyrrithione Zinc 5</b>  | 7.770393878       | 1.628158803                       | -0.27707 |
| <b>Pyrrithione Zinc 10</b> | 8.762359994       | 2.009086981                       | 0.490385 |
| <b>Pyrrithione Zinc 20</b> | 20.89329247       | 1.723136342                       | 4.360371 |
| <b>Ramoplanin 5</b>        | 16.75894992       | 3.420217172                       | 3.222757 |
| <b>Ramoplanin 10</b>       | 19.17718295       | 2.73164563                        | 4.030754 |
| <b>Ramoplanin 20</b>       | 23.35658231       | 5.046969091                       | 4.826715 |
| <b>Thiostrepton 5</b>      | 8.94419779        | 1.348363893                       | 0.46252  |
| <b>Thiostrepton 10</b>     | 8.910353091       | 1.231485311                       | 1.458945 |
| <b>Thiostrepton 20</b>     | 10.82155098       | 2.236051978                       | 1.429046 |

**Table S5. List of hits from confirmation II in transwells. Related to Figure S1.**

| Treatment         | POS/Cell | Median between fields | Mean between wells |
|-------------------|----------|-----------------------|--------------------|
| <b>DMSO</b>       | 3.08     | 3.114                 | 3.189              |
|                   | 5.168    |                       |                    |
|                   | 3.148    |                       |                    |
|                   | 2.212    |                       |                    |
|                   | 3.272    | 3.264                 |                    |
|                   | 3.66     |                       |                    |
|                   | 3.096    |                       |                    |
|                   | 3.256    |                       |                    |
| <b>Ouabain 5</b>  | 1.372    | 1.332                 | 1.306              |
|                   | 1.2      |                       |                    |
|                   | 1.292    |                       |                    |
|                   | 1.66     |                       |                    |
|                   | 1.292    | 1.28                  |                    |
|                   | 1.4      |                       |                    |
|                   | 1.268    |                       |                    |
|                   | 1.164    |                       |                    |
| <b>Ouabain 10</b> | 0.6      | 0.914                 | 1.068              |
|                   | 1.084    |                       |                    |
|                   | 0.744    |                       |                    |
|                   | 1.172    |                       |                    |
|                   | 2.504    | 1.222                 |                    |
|                   | 1.304    |                       |                    |
|                   | 1.14     |                       |                    |
|                   | 0.852    |                       |                    |
|                   | 1.416    | 1.508                 | 1.266              |

|                           |        |        |        |
|---------------------------|--------|--------|--------|
| <b>Ouabain 20</b>         | 1.468  |        |        |
|                           | 1.872  |        |        |
|                           | 1.548  |        |        |
|                           | 1.016  | 1.024  |        |
|                           | 0.96   |        |        |
|                           | 1.324  |        |        |
|                           | 1.032  |        |        |
| <b>Pyrithione Zinc 5</b>  | 2.872  | 2.684  | 2.284  |
|                           | 2.496  |        |        |
|                           | 3.184  |        |        |
|                           | 1.724  |        |        |
|                           | 1.568  | 1.884  |        |
|                           | 2.084  |        |        |
|                           | 2.008  |        |        |
|                           | 1.76   |        |        |
| <b>Pyrithione Zinc 10</b> | 1.864  | 2.076  | 1.801  |
|                           | 4.116  |        |        |
|                           | 2.288  |        |        |
|                           | 1.448  |        |        |
|                           | 1.756  | 1.526  |        |
|                           | 1.728  |        |        |
|                           | 1.208  |        |        |
|                           | 1.324  |        |        |
| <b>Pyrithione Zinc 20</b> | 3.368  | 3.448  | 4.396  |
|                           | 5.044  |        |        |
|                           | 3.528  |        |        |
|                           | 2.548  |        |        |
|                           | 4.66   | 5.344  |        |
|                           | 6.028  |        |        |
|                           | 4.38   |        |        |
|                           | 7.476  |        |        |
| <b>Ramoplanin 5</b>       | 9.392  | 13.564 | 12.939 |
|                           | 15.204 |        |        |
|                           | 13.804 |        |        |
|                           | 13.324 |        |        |
|                           | 13.576 | 12.314 |        |
|                           | 11.772 |        |        |
|                           | 12.856 |        |        |
|                           | 8.92   |        |        |
| <b>Ramoplanin 10</b>      | 16.588 | 14.744 | 13.415 |
|                           | 8.316  |        |        |
|                           | 14.976 |        |        |
|                           | 14.512 |        |        |
|                           | 12.284 | 12.086 |        |
|                           | 11.888 |        |        |
|                           | 9.584  |        |        |
|                           | 14.552 |        |        |



|                      |        |       |        |
|----------------------|--------|-------|--------|
| <b>Ramoplanin 20</b> | 8.268  | 9.966 | 13.843 |
|                      | 11.664 |       |        |
|                      | 4.772  |       |        |
|                      | 13.04  |       |        |
|                      | 25.848 | 17.72 |        |
|                      | 22.092 |       |        |
|                      | 9.38   |       |        |
|                      | 13.348 |       |        |
| <b>Digoxin 5</b>     | 1.4    | 1.312 | 1.484  |
|                      | 1.244  |       |        |
|                      | 1.344  |       |        |
|                      | 1.28   |       |        |
|                      | 2.432  | 1.656 |        |
|                      | 1.224  |       |        |
|                      | 1.248  |       |        |
|                      | 2.064  |       |        |
| <b>Digoxin 10</b>    | 1.724  | 1.548 | 1.523  |
|                      | 1.428  |       |        |
|                      | 1.184  |       |        |
|                      | 1.668  |       |        |
|                      | 0.968  | 1.498 |        |
|                      | 0.86   |       |        |
|                      | 2.028  |       |        |
|                      | 2.048  |       |        |
| <b>Digoxin 20</b>    | 2.12   | 1.684 | 1.464  |
|                      | 2.684  |       |        |
|                      | 1.248  |       |        |
|                      | 0.948  |       |        |
|                      | 0.86   | 1.244 |        |
|                      | 1.508  |       |        |
|                      | 0.98   |       |        |
|                      | 1.568  |       |        |
| <b>No POS</b>        | 0      | 0     | 0      |
|                      | 0      |       |        |
|                      | 0      |       |        |
|                      | 0      |       |        |
|                      | 0      | 0     |        |
|                      | 0.004  |       |        |
|                      | 0      |       |        |
|                      | 0      |       |        |

**Table S6. RNA seq data of samples treated with POS and Ramoplanin compared to samples treated with POS and DMSO (Excel Table). Related To Figure 5.**

**Table S7. IPA based analysis of RNA seq data (Excel Table). Related to Figure 5.**

**Table S8. Resources Table**

| <b>Reagent or Resource</b>                           | <b>SOURCE</b>    | <b>IDENTIFIER</b>                                                                                               |
|------------------------------------------------------|------------------|-----------------------------------------------------------------------------------------------------------------|
| <b>Antibodies</b>                                    |                  |                                                                                                                 |
| rhodopsin (TEM)                                      | Sigma            | O4886                                                                                                           |
| rhodopsin (Immuno-blot)                              | Abcam            | ab5417                                                                                                          |
| ZO1                                                  | Invitrogen       | 402200,                                                                                                         |
| Bestrophin1                                          | Abcam            | ab2182                                                                                                          |
| MITF                                                 | Abcam            | ab122982                                                                                                        |
| MERTK                                                | Abcam            | ab52968                                                                                                         |
| EZRIN                                                | Santa Cruz       | sc-58758                                                                                                        |
| $\beta$ -TUBULIN                                     | Thermo Fisher    | PA5-16863                                                                                                       |
| Alexa Fluor 488 rabbit                               | Invitrogen       | A21206                                                                                                          |
| Alexa Fluor 488 mouse                                | Invitrogen       | A21202                                                                                                          |
| Alexa Fluor 647 rabbit                               | Invitrogen       | A31573                                                                                                          |
| Alexa Fluor 647 mouse                                | Invitrogen       | A31571                                                                                                          |
| HRP-rabbit secondary antibody                        | Invitrogen       | 32260                                                                                                           |
| HRP- mouse secondary antibody                        | Thermo Fisher    | 62-6520                                                                                                         |
| rabbit anti mouse bridging antibody                  | Sigma            | M7023_2ML                                                                                                       |
| protein A gold                                       | CMC Utrecht      | <a href="https://www.cellbiology-utrecht.nl/products.html">https://www.cellbiology-utrecht.nl/products.html</a> |
| <b>Chemicals, Peptides, and Recombinant Proteins</b> |                  |                                                                                                                 |
| soybean trypsin inhibitor                            | Sigma            | T6522                                                                                                           |
| trypsin-EDTA                                         | Gibco            | T3924                                                                                                           |
| ACTIVIN A                                            | R&D              | 338-AC-050                                                                                                      |
| Antibiotic-Antimycotic                               | Gibco            | 15240-062                                                                                                       |
| TrypLE                                               | Thermo Fisher    | 12563011                                                                                                        |
| protease inhibitors                                  | Roche            | 4693132001                                                                                                      |
| Fluorescein FITC                                     | Invitrogen       | F2182                                                                                                           |
| Alexa Fluor 555                                      | Invitrogen       | A20009                                                                                                          |
| Alexa Fluor 647 Phalloidin                           | Invitrogen       | A22287                                                                                                          |
| GAS6                                                 | R&D systems      | 885-GSB                                                                                                         |
| MFGE8                                                | R&D systems      | 2767-MF                                                                                                         |
| FTY720                                               | SIGMA            | SML0700                                                                                                         |
| Tunicamycine                                         | SIGMA            | T7765                                                                                                           |
| Serum (FBS)                                          | gibco            | 26140-079                                                                                                       |
| trypan blue                                          | Sigma            | T8154                                                                                                           |
| Paraformaldehyde                                     | Science Services | E15714-S                                                                                                        |
| Glutaraldehyde                                       | Science Services | E16220                                                                                                          |
| Hoechst 33342                                        | Thermo Fisher    | H1399                                                                                                           |
| RIPA                                                 | Thermo Fisher    | 89900                                                                                                           |
| BSA                                                  | SERVA            | 11926.03                                                                                                        |
| 10% Mini-PROTEAN® TGX™<br>Precast Protein Gels       | BioRad           | 4561033                                                                                                         |
| Precision Plus Protein™ WesternC™                    | BioRad           | 1610376                                                                                                         |
| SuperSignal™ West                                    | Thermo Fisher    | 34075                                                                                                           |
| Precision Protein™ StrepTactin-HRP<br>Conjugate      | BioRad           | 1610380                                                                                                         |
| Lowicryl K4M resin                                   | Science Services | 14330                                                                                                           |
| osmium tetroxide                                     | Science Services | 19190                                                                                                           |

|                                                             |                               |                                                                                                                                               |
|-------------------------------------------------------------|-------------------------------|-----------------------------------------------------------------------------------------------------------------------------------------------|
| mTESR1                                                      | StemCell Technologies         | 85870                                                                                                                                         |
| Dispase                                                     | StemCell Technologies         | 7923                                                                                                                                          |
| Rock inhibitor Y-27632                                      | StemCell Technologies         | 78003                                                                                                                                         |
| <b>Critical Commercial Assays</b>                           |                               |                                                                                                                                               |
| RNeasy Mini kit                                             | Qiagen                        | 74106                                                                                                                                         |
| SuperScript™ II Reverse Transcriptase                       | Invitrogen                    | 18064022                                                                                                                                      |
| SYBR™ Green PCR Master Mix                                  | Applied Biosystems            | 4309155                                                                                                                                       |
| NEBNext Poly(A) mRNA Magnetic Isolation Module              | NEB                           | E7490L                                                                                                                                        |
| NEBNext Ultra Directional RNA Library Prep Kit for Illumina | NEB                           | E7420L                                                                                                                                        |
| XP bead purification                                        | Beckman Coulter               | A63882                                                                                                                                        |
| VEGF Human ELISA Kit                                        | Invitrogen                    | KHG0112                                                                                                                                       |
| Qubit dsDNA HS Assay Kit                                    | Invitrogen                    | Q32854                                                                                                                                        |
|                                                             |                               |                                                                                                                                               |
| H9 human embryonic stem cell line                           | WiCell                        | WA-09                                                                                                                                         |
| MERTK knockout in H9 (MERTK-EX2)                            | Previous study                | <a href="https://doi.org/10.1016/j.stemcr.2020.02.004">DOI: 10.1016/j.stemcr.2020.02.004</a>                                                  |
| MERTK knockout in H9 (MERTK-EX14)                           | Previous study                | <a href="https://doi.org/10.1016/j.stemcr.2020.02.004">DOI: 10.1016/j.stemcr.2020.02.004</a>                                                  |
| RP38 patient iPSC (MERTK)                                   | Previous study                | <a href="https://doi.org/10.1016/j.stemcr.2020.02.004">DOI: 10.1016/j.stemcr.2020.02.004</a>                                                  |
| TSS isogenic iPSC control                                   | Previous study                | <a href="https://doi.org/10.1016/j.stemcr.2020.02.004">DOI: 10.1016/j.stemcr.2020.02.004</a>                                                  |
|                                                             |                               |                                                                                                                                               |
| GraphPad Prism                                              | La Jolla California USA,      | www.graphpad.com                                                                                                                              |
| Knime                                                       | Berthold et al., 2009         |                                                                                                                                               |
| Cell Profiler                                               | Lamprecht et al., 2007        |                                                                                                                                               |
| GSNAP (v2014-12-17)                                         |                               | <a href="http://research-pub.gene.com/gmap">http://research-pub.gene.com/gmap</a> .                                                           |
| featureCounts (v1.4.6)                                      | Liao et al., 2014             | <a href="http://subread.sourceforge.net/">http://subread.sourceforge.net/</a>                                                                 |
| R                                                           |                               | <a href="https://www.r-project.org/">https://www.r-project.org/</a>                                                                           |
| DESeq2 R package (v1.6.3)                                   | Love et al., 2014             | <a href="https://bioconductor.org/packages/release/bioc/html/DESeq2.html">https://bioconductor.org/packages/release/bioc/html/DESeq2.html</a> |
|                                                             |                               |                                                                                                                                               |
| 384 well plates                                             | Greiner                       | 781091                                                                                                                                        |
| Transwells                                                  | Corning                       | 3470                                                                                                                                          |
|                                                             |                               |                                                                                                                                               |
| ERMN F:                                                     | SIGMA                         | ATGGGGATAAACCCACCTGAAAAC                                                                                                                      |
| ERMN R:                                                     | SIGMA                         | GAGCAGCATGTTCCCTTGTA                                                                                                                          |
| S1PR5 F:                                                    | SIGMA                         | GCGCACCTGTCTGTACTC                                                                                                                            |
| S1PR5 R:                                                    | SIGMA                         | GTTGGTGAGCGTGTAGATGATG                                                                                                                        |
| MFSD2A F:                                                   | SIGMA                         | ATCAGCACCGAGCAGACTG                                                                                                                           |
| MFSD2A R:                                                   | SIGMA                         | GCTATTGAGGTCTGGAAACAAG                                                                                                                        |
|                                                             |                               |                                                                                                                                               |
| Pharmakon 1600                                              | MircoSource Discovery Systems |                                                                                                                                               |
| Ramoplanin                                                  | SIGMA                         | R1781                                                                                                                                         |
| Pyrethrin Zinc                                              | SIGMA                         | PHR1401                                                                                                                                       |
| Digoxin                                                     | SIGMA                         | 1200000                                                                                                                                       |
| Ouabain                                                     | SIGMA                         | O0200000                                                                                                                                      |
| Cephapirin Sodium                                           | SIGMA                         | 1102500                                                                                                                                       |
| Potassium p-Aminobenzoate                                   | SIGMA                         | A0254                                                                                                                                         |
| Sennoside A                                                 | SIGMA                         | 1612018                                                                                                                                       |
| Carbidopa                                                   | SIGMA                         | C1335                                                                                                                                         |
| Doxorubicin                                                 | SIGMA                         | 1225703                                                                                                                                       |
| Homidium Bromide                                            | SIGMA                         | E8751                                                                                                                                         |
| Merbromin                                                   | SIGMA                         | M7011                                                                                                                                         |
| Succinylsulfathiazole                                       | SIGMA                         | S8752                                                                                                                                         |

## Supplemental Experimental Procedures:

### Cell lines and cell culture

RPE derived from H9 hESC cell line (hESC-RPE) were used as wild-type control. Wild-type iPSC line was derived in collaboration with the stem cell and engineering facility in the CRTD. Fibroblasts were isolated from skin biopsies from RP38 patients and were reprogrammed using the non-integrating Sendai virus. RPE differentiated from patient iPSC is referred to as “MERTK-RPE” throughout the manuscript. *MERTK* gene editing with CRISPR/CAS9 was done in H9 hESC. Two modified hESC lines were obtained EX2 and EX14. Differentiated RPE are referred to as “EX2-RPE” and “EX14-RPE” throughout the manuscript. Detailed description of the generation of *MERTK* knock out cell lines, and patient iPSC line, and the characterization of the pluripotent cell lines were previously described in Almedawar et al. (Almedawar et al., 2020). All RPE cells were differentiated on transwell filters as previously described (Zhu et al., 2014, 2013) with some modifications. Briefly, dissociated stem cell colonies were counted prior to embedding in matrigel and the amount of matrigel was adjusted accordingly. Following neuroepithelial cysts trypsinization between 100,000 and 150,000 cells were plated on transwells in the presence of 5  $\mu$ M rock inhibitor. Activin A concentration was reduced to 0.02  $\mu$ g/ml for RPE differentiation from hESC and to 0.01  $\mu$ g/ml for RPE differentiation from iPSC. RPE cells were passaged for expansion two times on transwells before use. For some experiments and as indicated in the experimental schemes, RPE cells were passaged first on transwells for expansion and then to 384-wells plates and used after 13 days. For passaging, cells on transwells were incubated with trypsin-EDTA (TE) for 10 minutes at 37°C and 5% CO<sub>2</sub>. After incubation, cells were vigorously pipetted to obtain single cells, and transferred to a tube containing RPE medium plus soybean trypsin inhibitor. Next, RPE single cells were washed by centrifugation at 180 g for two minutes. Finally, cells were resuspended with RPE media containing activin A and 1x Antibiotic-Antimycotic, and 45,000 cells per one 384 well, or 300,000 cells per transwell were plated.

### Immunofluorescence labeling of RPE cells

Cells were fixed with 4% paraformaldehyde (PFA). After several washes with PBS, they were treated with the quenching solution (1x PBS, 100 mM Glycine, 0.3% Triton X-100) for twenty minutes and then were incubated with the blocking solution (1xPBS, 1% BSA, 0.3% Triton X-100) for one hour. The primary and secondary antibodies were diluted in the blocking solution and incubated overnight at 4°C. Cell nuclei were counterstained by addition of Hoechst 33342 (1mg/ml) with the secondary antibody incubation step. The primary antibodies and their working dilutions were as follows: ZO1 (1:200), (1:500), MITF (1:500), MERTK (1:1000). The secondary antibodies Alexa Fluor 488/647 rabbit and mouse were used at 1:500 dilution. Phalloidin 647 was added to the cells after the secondary antibody (1:1000) overnight.

### Isolation of porcine POS

POS were isolated from porcine eyes, as described previously (Molday et al., 1987) with some modifications. Briefly, the retinal tissue was isolated from 50 porcine eyes and homogenized in a buffer containing protease inhibitors, 0.2 mM Tris-HCl, 0.1 mM Glucose, 130 mM NaCl<sub>2</sub>, 0.1 mM Taurine, and 0.02 mM MgCl<sub>2</sub>. The homogenized retinal tissue was split in 6 tubes containing a sucrose gradient of 27%, 33%, 41%, 50% and 60%, and centrifuged in the Beckmann Coulter ultracentrifuge B409 at 28000 rpm for one hour at 4° C. The orange band was collected in Nalgene centrifuge tubes, and centrifuged at 13000 g for 10 minutes. Finally, the pellets were resuspended with POS storage solution containing protease inhibitors, 10 mM phosphate buffer pH 7.2, 100 mM NaCl<sub>2</sub> and 2.5% sucrose and stored at -80 °C until they were used.

### POS labeling

For labeling, Fluorescein (FITC) or Alexa Fluor 555 (AF555) were added to the POS after thawing for 1 hour at 25°C with shaking (500 rpm). Next, POS were centrifuged at 9000 g at 4°C for 10 minutes, and washed twice with the washing buffer, containing: 10% sucrose, 20 mM phosphate buffer pH7.2 and 5 mM Taurine.

### Phagocytosis assay

For all experiments, cells were primed with the different treatments for 1 hour before the addition of POS. POS particles were sonicated in 500  $\mu$ l RPE media containing the different treatments (MFGE8, GAS6) for 5 seconds 10% power with BRANSON Digital Sonifier 450 before addition to the cells to prevent aggregation. The composition of RPE media has been described previously (Zhu et al., 2014, 2013). Before seeding, POS were quantified using the Neubauer chamber combined with fluorescence microscopy imaging and CellProfiler analysis. In all phagocytosis experiments, unbound POS were washed away before fixation, at various time points after POS addition, depending on the purpose of the experiment, using PBS containing 1 mM MgCl<sub>2</sub> and 0.2 mM CaCl<sub>2</sub> (PBS-MC). GraphPad Prism was used for statistical significance calculations as indicated in the figure legend and final graph presentation.

### Primary screening phagocytosis assay

HESC-RPE were plated in 384-wells plates for 13 days before they were used for screening. On the screening day RPE cells were primed for one hour with the library or the control treatment including MFGE8 and GAS6 (2.5  $\mu$ g/ml) and DMSO only. The compounds were added to the cells in the presence of 25  $\mu$ l RPE media containing 0.3125  $\mu$ g/ml MFGE8 using Echo acoustic liquid handler (Beckmann Coulter). During the priming, POS were labeled with AF555 and prepared for addition. After one hour of priming 25  $\mu$ l of labeled POS were added to the cells and the library compounds were added again, so that the final concentration of the compounds in the library is 10  $\mu$ M. After three hours incubation at 37°C, 5% CO<sub>2</sub>, cells were washed five times with PBS and incubated with PBS with Hoechst overnight. Plates were acquired the next day using Yokogawa’s CV7000S confocal microscope. The library consisting of 1600 FDA approved compounds was distributed over nine 384-wells plates with 192 compounds each except for plate 9 which contains 64 compounds.

The screen was performed four times using four consecutive RPE preps. Besides the library, the screening plate consisted of twenty-four wells containing 0.3125 µg/ml MFGE8, DMSO (0.1%) and POS, four wells containing DMSO (0.1 %) and POS only without MFGE8, twelve wells without POS, eight wells MFGE8 and Gas6 (2.5 µg/ml) and POS, and four wells untreated (No DMSO or MFGE8) with POS.

#### **Imaging and Image analysis**

During Imaging, nine optical sections from six fields in each well were acquired, using the 63X objective, covering the different areas in the well. Acquired images were imported into the CellProfiler (Lamprecht et al., 2007) software for image analysis. POS and nuclei were segmented and values of the number, size and intensity were obtained.

#### **Data and statistical analysis**

The data obtained from image analysis was imported into KNIME (Berthold et al., 2009) for statistical analysis. The median count of the POS between the 6 images was divided by the median count of cells per well to obtain the POS/cell count. To determine positive and negative hits, log POS/cell for each well was calculated and used to calculate the z-score using the following formula:

$$z - score = \frac{\text{Log} \frac{POS}{cell} \text{ treatment} - \text{Mean Log} \frac{POS}{cell} \text{ DMSO}}{SD \text{ DMSO}}$$

Compounds that gave a z-score of  $\geq +3$  were considered as positive hits and compounds that gave a z-score of  $\leq -3$  were considered negative hits.

To calculate the coefficient of variation (CV), the following formula was used:

$$CV = \frac{Mad \text{ POS/cell}}{Median \text{ POS/cell}} \times 100$$

#### **Hits confirmation:**

For confirming the obtained hits the hits were reordered as powder from Sigma-Aldrich and added to the cells with and without POS with three different concentrations (5 µM, 10 µM, 15 µM) in 384-wells plates (confirmation I) and then in transwell plates (confirmation II). Confirmed hits were subjected to further validation using secondary assays.

#### **Orthogonal assays**

##### **Western Blot based phagocytosis assay:**

To distinguish total and internalized POS by means of western blot, half of the samples were treated with 2 mM EDTA for 10 minutes to remove bound POS from the cells before lysis and the other half was left with PBS as described previously (Mao and Finnemann, 2013). Around one million cells were lysed with RIPA buffer for 30 minutes at 4°C. Next, the protein lysates were separated from the pellet by centrifugation and around 50 µg of protein was loaded into Mini-PROTEAN® TGX™ Precast Protein Gels. 10 µl of Precision Plus Protein™ WesternC™ was loaded as a standard. Proteins were transferred into PVDF membrane using TE70 Semi-dry transfer unit. Blocking was done for one hour at room temperature in 5% milk dissolved in TBST. To analyze POS phagocytosis by means of western blot, membranes were incubated with mouse anti-RHO antibody (1:1000), which recognizes the C-terminal of the protein, followed by anti-rabbit β-TUBULIN (1:1000) antibody overnight at 4 °C in 5% milk-TBST. HRP-mouse secondary antibody (1:1000) and HRP-rabbit secondary antibody (1:1000) were added for one hour at room temperature in 5% milk-TBST. Precision Protein™ StrepTactin-HRP Conjugate was also added with the secondary to view the standard in chemiluminescence mode. The blot membrane was incubated with SuperSignal™ West according to Manufacturer's instructions and imaged with LAS4000.

##### **Fluorescence based phagocytosis assay in transwells**

RPE cells grown in transwells were cut out from the well, transferred on slides and imaged using SP5-MP confocal microscope. During imaging thirty-one optical sections in three fields per well were acquired.

##### **Trypan blue based phagocytosis assay**

To distinguish bound and internalized POS by means of fluorescence imaging, 0.4% trypan blue or PBS were added to RPE cells in 384-wells plates for 10 minutes and then washed six times with PBS to remove leftover dye before methanol fixation at -20 °C, as described previously (Almedawar et al., 2020; Mao and Finnemann, 2013). Trypan blue quenches bound POS in treated wells and allows the detection of internalized POS only. CV7000S confocal microscope was used for imaging.

##### **FACS based phagocytosis assay:**

To monitor the effect of RM on POS degradation AF555-labeled POS were added to the cells. After three hours the cells were washed and RM (20 µM) or Chloroquine (50 µM) were added to the cells for twenty-one more hours. Cells were then trypsinized and subjected to FACS sorting using Amnis® ImageStream®X Mk II Imaging Flow Cytometer. Trypsinization detached bound POS allowing visualization of internalized POS as described in (Westenskow et al., 2012).

##### **Scanning Electron Microscopy (SEM)**

RPE cells on transwell filters were fixed with modified Karnovsky's solution, containing 2% glutaraldehyde (GA) plus 2% PFA in 0.1 M phosphate buffer pH 7.4, until processing. For processing, samples were washed with PBS and post-fixed in 1% osmium tetroxide in PBS for two hours on ice. Next, they were washed with water and dehydrated in a graded series of ethanol starting from 30% and up to 100%. Then, they were critical-point dried using the Leica CPD 300 (Leica Microsystems, Vienna, Austria), cut out from the transwell, mounted on 12 mm aluminium stubs, and sputter-coated with gold using the Baltec SCD 050 (Leica Microsystems, Vienna, Austria). Finally, filters were analyzed with a Jeol JSM

7500F cold field emission SEM (Jeol, Eching, Germany) at 5 kV acceleration voltage using the lower secondary electron detector.

### Transmission Electron Microscopy (TEM)

For immune-EM of POS seeded on RPE, the samples were fixed in 4% PFA. After several washes in PBS, the filters with the cells were dissected with a razor blade into small pieces (1-2 mm) and dehydrated and infiltrated in Lowicryl K4M resin using the progressive lowering of temperature (PLT) method (Carlemalm et al., 1982). After polymerisation, the blocks were raised up to room temperature, and 70 nm sections were cut on a Leica UC6 ultramicrotome. Sections were mounted onto copper mesh grids for immunolabeling. On-section labeling of ultrathin sections was performed as previously described (Fabig et al., 2012). In brief, sections were blocked with 1% BSA in PBS, incubated for one hour with primary antibodies mouse anti-RHO (1:200) in BSA/PBS. Next, they were washed with PBS, and incubated with bridging antibody (rabbit anti mouse, 1:100 in BSA/PBS) for thirty minutes. Sections were then washed with PBS, incubated with protein A gold (1:100) for one hour in BSA/PBS, washed with PBS, post-fixed in 1% glutaraldehyde/PBS, washed with water, stained with 4% uranyl acetate in water, washed with water and dried for TEM inspection. Ultrastructure and gold labeling was imaged with a FEI Morgagni 268D or a Jeol JEM1400 Plus both at 80 kV acceleration voltage.

### Next-generation sequencing (RNA-seq)

HESC-RPE cultured in transwells were pretreated with either 20  $\mu$ M RM or 0.2% DMSO in the presence of 0.3125  $\mu$ g/ml MFGE8 for 1 hour. Then, POS were seeded on the cells and incubated for 3 hours before they were lysed and total RNA was purified from three consecutive RPE differentiation rounds, using Qiagen RNeasy Mini kit. Control samples included the same treatment without POS and untreated samples. Using the NEBNext Poly(A) mRNA Magnetic Isolation Module, polyadenylated mRNA was enriched from 1  $\mu$ g total RNA with an integrity number of  $\geq 9$ , according to the manufacturer's instructions. The mRNA was eluted in 15  $\mu$ l 2x first strand cDNA synthesis buffer (NEBNext), in order to chemically fragment the samples, followed by reverse transcription, second strand synthesis, end repair, A tailing and adapter ligation according to the manual of NEBNext Ultra Directional RNA Library Prep Kit for Illumina. For ligation, hybridized custom adaptors were used (Adaptor-Oligo 1 and 2). Afterwards, excess of non-ligated adaptors were depleted by an XP bead purification, adding 1x bead. Finally, samples were indexed during a PCR enrichment step with 15 cycles of amplification using primers carrying a specific index sequence indicated with 'NNNNNN' (Index Primer1, 2 and 3). After two more XP beads purifications (0.9x) libraries were quantified using Fragment Analyzer Standard Kit. For Illumina flowcell production, samples were equimolarly pooled and then sequenced on two Illumina NextSeq flowcells in 75bp single-end mode.

| Oligonucleotide sequence                                                                     | SOURCE     |
|----------------------------------------------------------------------------------------------|------------|
| Adaptor-Oligo 1: 5'-ACA CTC TTT CCC TAC ACG ACG CTC TTC CGA TCT 3'                           | This Study |
| Adaptor-Oligo 2: 5'-P-GAT CGG AAG AGC ACA CGT CTG AAC TCC AGT CAC-3'                         | This Study |
| Index Primer1: AAT GAT ACG GCG ACC ACC GAG ATC TAC ACT CTT TCC CTA CAC GAC GCT CTT CCG ATC T | This Study |
| Index Primer2: GTG ACT GGA GTT CAG ACG TGT GCT CTT CCG ATC T                                 | This Study |
| Index Primer3: CAA GCA GAA GAC GGC ATA CGA GAT NNNNNN GTG ACT GGA GTT                        | This Study |

Resulting reads were mapped with GSNAP (v2017-08-15) to the human genome (hg38) using splice junction information from Ensembl (v81) as support. Uniquely mapped reads were then converted into counts per gene using featureCounts (v1.5.3) and gene annotations from Ensembl (v81). Normalization of the raw counts based on the library size and testing for differential expression between the different cell types/treatments was performed with the DESeq2 R package (1.18.1). Genes with adjusted p-value (Benjamini-Hochberg) less than 0.05 were considered differentially expressed. The heat maps presented in Figure 6 were generated using GraphPad Prism. Images in Figure S7 and data in Table S7 were generated using Ingenuity Pathway Analysis software (IPA).

### Quantitative PCR (qPCR)

HESC-RPE cultured in transwells were pretreated with either 20  $\mu$ M RM or 0.2% DMSO in the presence of 0.3125  $\mu$ g/ml MFGE8 for 1 hour. Then, POS were seeded on the cells and incubated for 3 hours before they were lysed and total RNA was purified from three consecutive RPE differentiation rounds, using Qiagen RNeasy Mini kit. For reverse transcription, 500 ng of RNA were incubated with random primers and dNTP Mix for 5 minutes at 65  $^{\circ}$ C. Next, SuperscriptII RT enzyme, 5X first strand buffer, DTT and RNase out were added to the reaction. Primer hybridization, reverse transcription and enzyme deactivation were performed in the thermocycler according to the following program: 25  $^{\circ}$ C for 10 minutes, 42  $^{\circ}$ C for 50 minutes, 70  $^{\circ}$ C for 15 minutes. For the qPCR 1.5  $\mu$ l of the cDNA was added to the reaction containing SYBR<sup>TM</sup> Green PCR master mix S1PR5, POLR2A, MSFD2A and ERMN primers according to manufacturer's instructions. Quantitative PCR was performed on three biological experimental repeats and nine technical repeats, which include three cDNAs and from each cDNA three wells, per condition.

### Transepithelial resistance (TER) measurement

TER was measured before treatment with RM and controls, and 3, 6, and 24 hours following treatment with the EVOM<sup>2</sup> using STX2 electrodes. Represented TER values were calculated as follows:

$$TER (\Omega * cm^2) = (Sample\ TER (\Omega) - Blank\ TER (\Omega)) \times Area\ cm^2$$

Whereby, blank is a transwell coated with GFR matrigel, and contains the same amount of media as the sample, and the area of the used transwells is 0.03 cm<sup>2</sup>.

#### **VEGF ELISA based Measurement**

Media from the upper chamber and the lower chamber of the transwells where RPE cells were cultured was collected and frozen at -80 °C before treatment and twenty-four hours after treatment with RM and controls. Media was diluted 1:5, and VEGF ELISA was performed according to manufacturer's instructions.

#### **References**

- Almedawar, S., Vafia, K., Schreiter, S., Neumann, K., Khattak, S., Kurth, T., Ader, M., Karl, M.O., Tsang, S.H., Tanaka, E.M., 2020. MERTK-Dependent Ensheathment of Photoreceptor Outer Segments by Human Pluripotent Stem Cell-Derived Retinal Pigment Epithelium. *Stem Cell Reports* 14, 374–389.
- Berthold, M.R., Cebron, N., Dill, F., Gabriel, T.R., Kötter, T., Meinl, T., Ohl, P., Thiel, K., Wiswedel, B., 2009. KNIME - the Konstanz information miner. *ACM SIGKDD Explor. Newsl.* 11, 26.
- Carlemalm, E., Garavito, R.M., Villiger, W., 1982. Resin development for electron microscopy and an analysis of embedding at low temperature. *J. Microsc.* 126, 123–143.
- Fabig, G., Kretschmar, S., Weiche, S., Eberle, D., Ader, M., Kurth, T., 2012. Labeling of Ultrathin Resin Sections for Correlative Light and Electron Microscopy. *Methods Cell Biol.* 111, 75–93.
- Lamprecht, M.R., Sabatini, D.M., Carpenter, A.E., 2007. CellProfiler: Free, versatile software for automated biological image analysis. *Biotechniques* 42, 71–75.
- Mao, Y., Finnemann, S.C., 2013. Analysis of Photoreceptor Outer Segment Phagocytosis by RPE Cells in Culture. *Methods Mol. Biol.* 935, 285–295.
- Molday, R., Hicks, D., Molday, L., 1987. Peripherin . A Rim-Specific Membrane Protein of Rod Outer Segment Discs. *Invest. Ophthalmol. Vis. Sci.* 28, 50–61.
- Westenskow, P.D., Moreno, S.K., Krohne, T.U., Kurihara, T., Zhu, S., 2012. Using Flow Cytometry to Compare the Dynamics of Photoreceptor Outer Segment Phagocytosis in iPS-Derived. *Invest. Ophthalmol. Vis. Sci.* 53, 6282–6290.
- Zhu, Y., Carido, M., Meinhardt, A., Kurth, T., Karl, M.O., Ader, M., Tanaka, E.M., 2013. Three-Dimensional Neuroepithelial Culture from Human Embryonic Stem Cells and Its Use for Quantitative Conversion to Retinal Pigment Epithelium. *PLoS One* 8, e54552.
- Zhu, Y., Schreiter, S., Tanaka, E.M., 2014. Accelerated Three-Dimensional Neuroepithelium Formation from Human Embryonic Stem Cells and Its Use for Quantitative Differentiation to Human Retinal Pigment Epithelium. *Methods Mol. Biol.* 1307, 345–355.
